# Supplementary material for: DFT Study of Adsorption Behavior of Nitro Species on Carbon-Doped Boron Nitride Nanoribbons for Toxic Gas Sensing
Source: MDPI journal article supplement (doi:10.3390/nano13081410), 2023-04-19
Supplement: s1 [file s1]

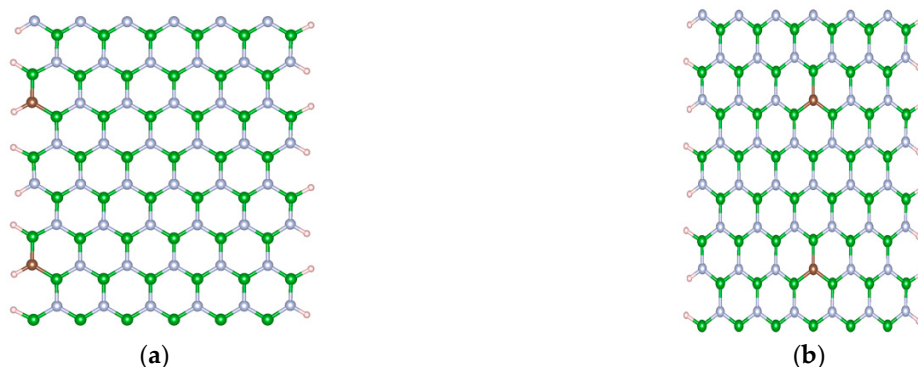

**Figure S1.** Schematic representation of a M-BNNR with 4-member rings in the periodic direction: (a) E\_M-BNNR and (b) C\_M-BNNR.

Optimized coordinates for pristine BNNR, 12 x 2

|   |           |           |          |
|---|-----------|-----------|----------|
| N | 0.985679  | 7.807322  | 5.000000 |
| B | 2.198260  | 7.114852  | 5.000000 |
| N | 3.423148  | 7.814341  | 5.000000 |
| B | 3.423509  | 9.239210  | 5.000000 |
| N | 2.198569  | 9.937736  | 5.000000 |
| B | 0.986549  | 9.243822  | 5.000000 |
| B | 4.644809  | 7.117476  | 5.000000 |
| N | 4.645104  | 5.676537  | 5.000000 |
| B | 3.423518  | 4.979245  | 5.000000 |
| N | 2.198464  | 5.677745  | 5.000000 |
| N | 5.857539  | 7.810951  | 5.000000 |
| B | 7.073721  | 7.117484  | 5.000000 |
| N | 7.073848  | 5.687485  | 5.000000 |
| B | 5.857965  | 4.983118  | 5.000000 |
| N | 8.288149  | 7.806510  | 5.000000 |
| B | 9.503527  | 7.111809  | 5.000000 |
| N | 9.504644  | 5.667449  | 5.000000 |
| B | 8.289373  | 4.972364  | 5.000000 |
| N | 10.720164 | 7.806357  | 5.000000 |
| B | 11.949442 | 7.107652  | 5.000000 |
| N | 11.949864 | 5.675908  | 5.000000 |
| B | 10.721711 | 4.973059  | 5.000000 |
| N | 13.161531 | 7.803093  | 5.000000 |
| B | 13.163227 | 9.244282  | 5.000000 |
| N | 11.949749 | 9.935829  | 5.000000 |
| B | 10.721297 | 9.233042  | 5.000000 |
| N | 9.504478  | 9.927523  | 5.000000 |
| B | 9.504099  | 11.371975 | 5.000000 |
| N | 10.720944 | 12.066503 | 5.000000 |
| B | 11.949881 | 11.367628 | 5.000000 |
| N | 14.383762 | 9.942282  | 5.000000 |
| B | 14.383288 | 11.367161 | 5.000000 |
| N | 13.161845 | 12.063191 | 5.000000 |

|   |           |           |          |
|---|-----------|-----------|----------|
| B | 8.289110  | 9.232405  | 5.000000 |
| N | 7.086427  | 9.943798  | 5.000000 |
| B | 7.086328  | 11.370295 | 5.000000 |
| N | 8.288730  | 12.066617 | 5.000000 |
| B | 13.163311 | 4.984314  | 5.000000 |
| N | 14.383723 | 5.682323  | 5.000000 |
| B | 14.382955 | 7.107149  | 5.000000 |
| B | 5.857958  | 9.243038  | 5.000000 |
| N | 4.645090  | 9.936511  | 5.000000 |
| B | 4.644826  | 11.377431 | 5.000000 |
| N | 5.857536  | 12.070940 | 5.000000 |
| B | 2.198367  | 11.374793 | 5.000000 |
| N | 3.423183  | 12.074311 | 5.000000 |
| B | 0.986469  | 4.983891  | 5.000000 |
| N | 0.985837  | 12.067333 | 5.000000 |
| H | 15.329713 | 5.142857  | 5.000000 |
| H | 15.328364 | 7.647634  | 5.000000 |
| H | 15.328656 | 11.907716 | 5.000000 |
| H | 0.161334  | 5.694575  | 5.000000 |
| H | 0.045159  | 7.258374  | 5.000000 |
| H | 0.161394  | 9.954481  | 5.000000 |
| H | 0.161418  | 11.355819 | 5.000000 |
| H | 15.324617 | 9.393909  | 5.000000 |

Optimized coordinates for E\_M-BNNR, 12 x 2

|   |           |          |          |
|---|-----------|----------|----------|
| H | 20.441330 | 0.863552 | 5.000000 |
| H | 20.666704 | 3.338318 | 5.000000 |
| H | 20.666977 | 7.707554 | 5.000000 |
| H | 4.721060  | 1.128165 | 5.000000 |
| H | 4.753009  | 3.042279 | 5.000000 |
| H | 4.717142  | 5.695369 | 5.000000 |
| H | 4.975795  | 7.403604 | 5.000000 |
| H | 20.440884 | 5.232770 | 5.000000 |
| C | 5.712397  | 3.557647 | 5.000000 |
| N | 7.026066  | 5.724326 | 5.000000 |
| N | 5.844355  | 7.929697 | 5.000000 |
| N | 7.044511  | 1.327978 | 5.000000 |
| N | 9.545887  | 5.699317 | 5.000000 |
| N | 8.315241  | 7.895314 | 5.000000 |
| N | 9.558711  | 1.338223 | 5.000000 |
| N | 12.068054 | 1.335342 | 5.000000 |
| N | 14.578456 | 1.336110 | 5.000000 |
| N | 17.088339 | 1.337705 | 5.000000 |
| N | 19.562565 | 1.371161 | 5.000000 |
| N | 18.352470 | 3.522330 | 5.000000 |
| N | 19.562466 | 5.740935 | 5.000000 |
| N | 18.352993 | 7.892292 | 5.000000 |
| N | 15.835560 | 7.891638 | 5.000000 |

|   |           |          |          |
|---|-----------|----------|----------|
| N | 13.323611 | 7.890264 | 5.000000 |
| N | 10.813334 | 7.888776 | 5.000000 |
| N | 10.810425 | 3.520285 | 5.000000 |
| N | 12.064280 | 5.704358 | 5.000000 |
| N | 14.577353 | 5.705993 | 5.000000 |
| N | 17.087910 | 5.707704 | 5.000000 |
| N | 13.322671 | 3.520877 | 5.000000 |
| N | 15.835262 | 3.521744 | 5.000000 |
| N | 8.291995  | 3.515263 | 5.000000 |
| B | 5.742583  | 5.060599 | 5.000000 |
| B | 7.060149  | 7.177559 | 5.000000 |
| B | 7.026217  | 2.780572 | 5.000000 |
| B | 5.790839  | 0.596126 | 5.000000 |
| B | 8.286075  | 4.969545 | 5.000000 |
| B | 9.560832  | 7.157945 | 5.000000 |
| B | 8.307312  | 0.605171 | 5.000000 |
| B | 10.813352 | 0.606414 | 5.000000 |
| B | 13.323753 | 0.606281 | 5.000000 |
| B | 15.834053 | 0.606918 | 5.000000 |
| B | 18.343945 | 0.607729 | 5.000000 |
| B | 19.596584 | 2.785650 | 5.000000 |
| B | 18.343637 | 4.977801 | 5.000000 |
| B | 19.596966 | 7.155382 | 5.000000 |
| B | 17.093334 | 7.162684 | 5.000000 |
| B | 14.580769 | 7.161287 | 5.000000 |
| B | 12.070251 | 7.159215 | 5.000000 |
| B | 9.551381  | 2.794535 | 5.000000 |
| B | 10.807987 | 4.973149 | 5.000000 |
| B | 13.321663 | 4.975832 | 5.000000 |
| B | 15.833324 | 4.976801 | 5.000000 |
| B | 12.067060 | 2.791247 | 5.000000 |
| B | 14.579971 | 2.791917 | 5.000000 |
| B | 17.093010 | 2.792726 | 5.000000 |

Optimized coordinates for C\_M-BNNR, 12 x 2

|   |           |          |          |
|---|-----------|----------|----------|
| H | 20.154916 | 0.964900 | 5.000000 |
| H | 20.395007 | 3.439412 | 5.000000 |
| H | 20.376043 | 7.816961 | 5.000000 |
| H | 20.149124 | 5.341263 | 5.000000 |
| H | 4.377785  | 1.259121 | 5.000000 |
| H | 4.595601  | 3.164114 | 5.000000 |
| H | 4.381659  | 5.639717 | 5.000000 |
| H | 4.609874  | 7.522076 | 5.000000 |
| C | 13.008688 | 3.640117 | 5.000000 |
| N | 5.476446  | 3.668228 | 5.000000 |
| N | 6.695943  | 5.818125 | 5.000000 |
| N | 5.486328  | 8.033894 | 5.000000 |
| N | 6.690967  | 1.447221 | 5.000000 |

|   |           |          |          |
|---|-----------|----------|----------|
| N | 9.218603  | 5.817145 | 5.000000 |
| N | 7.961830  | 8.003595 | 5.000000 |
| N | 9.209694  | 1.450165 | 5.000000 |
| N | 11.723803 | 1.434685 | 5.000000 |
| N | 14.291681 | 1.434475 | 5.000000 |
| N | 16.803885 | 1.449943 | 5.000000 |
| N | 19.279128 | 1.477720 | 5.000000 |
| N | 18.080010 | 3.632590 | 5.000000 |
| N | 19.271922 | 5.851667 | 5.000000 |
| N | 18.061448 | 8.001420 | 5.000000 |
| N | 15.546300 | 8.007016 | 5.000000 |
| N | 13.008098 | 8.019036 | 5.000000 |
| N | 10.470505 | 8.007574 | 5.000000 |
| N | 10.451564 | 3.632167 | 5.000000 |
| N | 11.735053 | 5.851980 | 5.000000 |
| N | 14.279153 | 5.851740 | 5.000000 |
| N | 16.793536 | 5.816655 | 5.000000 |
| N | 15.566846 | 3.631679 | 5.000000 |
| N | 7.947073  | 3.634706 | 5.000000 |
| B | 16.799490 | 7.273011 | 5.000000 |
| B | 5.450270  | 5.083270 | 5.000000 |
| B | 6.706439  | 7.273256 | 5.000000 |
| B | 6.694794  | 2.903709 | 5.000000 |
| B | 5.449237  | 0.708687 | 5.000000 |
| B | 7.955477  | 5.088066 | 5.000000 |
| B | 9.219186  | 7.273949 | 5.000000 |
| B | 7.953919  | 0.719307 | 5.000000 |
| B | 10.466519 | 0.715612 | 5.000000 |
| B | 13.007945 | 0.731016 | 5.000000 |
| B | 15.548247 | 0.714813 | 5.000000 |
| B | 18.057270 | 0.717323 | 5.000000 |
| B | 19.321074 | 2.892750 | 5.000000 |
| B | 18.054573 | 5.086813 | 5.000000 |
| B | 19.305646 | 7.265073 | 5.000000 |
| B | 14.281403 | 7.296047 | 5.000000 |
| B | 11.735498 | 7.296291 | 5.000000 |
| B | 9.201746  | 2.907258 | 5.000000 |
| B | 10.479825 | 5.093498 | 5.000000 |
| B | 13.007234 | 5.147452 | 5.000000 |
| B | 15.533482 | 5.092566 | 5.000000 |
| B | 11.699445 | 2.886318 | 5.000000 |
| B | 14.319225 | 2.886144 | 5.000000 |
| B | 16.819304 | 2.906661 | 5.000000 |

Cell lattices for the BNNRs

|               |              |               |
|---------------|--------------|---------------|
| 25.3779602051 | 0.0000000000 | 0.0000000000  |
| 0.0000000000  | 8.7400000000 | 0.0000000000  |
| 0.0000000000  | 0.0000000000 | 10.0000000000 |

Optimized coordinates for NH<sub>4</sub><sup>+</sup>

|   |           |           |           |
|---|-----------|-----------|-----------|
| N | 0.000000  | 0.000000  | 0.000000  |
| H | 0.000000  | 0.000000  | 1.008000  |
| H | 0.950353  | 0.000000  | -0.335996 |
| H | -0.475176 | -0.823029 | -0.336000 |
| H | -0.475176 | 0.823029  | -0.336000 |

Optimized coordinates for NH<sub>3</sub>

|   |           |           |           |
|---|-----------|-----------|-----------|
| N | 0.000000  | 0.000000  | 0.000000  |
| H | 0.000000  | 0.000000  | 1.008000  |
| H | 0.950353  | 0.000000  | -0.335996 |
| H | -0.475176 | -0.823029 | -0.336000 |

Optimized coordinates for NO<sub>2</sub>

|   |          |          |           |
|---|----------|----------|-----------|
| N | 0.000000 | 0.000000 | 0.000000  |
| O | 0.000000 | 0.000000 | 1.400000  |
| O | 1.319934 | 0.000000 | -0.466662 |
